CORRECTION

# Correction: Frequencies, Laboratory Features, and Granulocyte Activation in Chinese Patients with *CALR*-Mutated Myeloproliferative Neoplasms

Haixiu Guo, Xiuhua Chen, Ruiyuan Tian, Jianmei Chang, Jianlan Li, Yanhong Tan, Zhifang Xu, Fanggang Ren, Junxia Zhao, Jie Pan, Na Zhang, Xiaojuan Wang, Jianxia He, Wanfang Yang, Hongwei Wang

There are errors in the Funding section. The correct funding information is as follows:

This work was supported by National Natural Science Fund (NO. 81241014), Shanxi Natural Science Fund (NO. 2011011038–2), The Science and Technology Innovation Fund of Shanxi Medical University (NO. 01201413), The Younger Fund of the Second Hospital of Shanxi Medical University (NO. 20120101), The Graduate excellent innovation Fund of Shanxi Province (NO. 20143101). The funders had no role in study design, data collection and analysis, decision to publish, or preparation of the manuscript.

## Reference

1. Guo H, Chen X, Tian R, Chang J, Li J, Tan Y, et al. (2015) Frequencies, Laboratory Features, and Granulocyte Activation in Chinese Patients with *CALR*-Mutated Myeloproliferative Neoplasms. PLoS ONE 10(9): e0138250. doi: [10.1371/journal.pone.0138250](https://doi.org/10.1371/journal.pone.0138250) PMID: [26375990](https://pubmed.ncbi.nlm.nih.gov/26375990/)

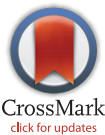

## OPEN ACCESS

**Citation:** Guo H, Chen X, Tian R, Chang J, Li J, Tan Y, et al. (2015) Correction: Frequencies, Laboratory Features, and Granulocyte Activation in Chinese Patients with *CALR*-Mutated Myeloproliferative Neoplasms. PLoS ONE 10(10): e0141173. doi:10.1371/journal.pone.0141173

**Published:** October 15, 2015

**Copyright:** © 2015 Guo et al. This is an open access article distributed under the terms of the [Creative Commons Attribution License](https://creativecommons.org/licenses/by/4.0/), which permits unrestricted use, distribution, and reproduction in any medium, provided the original author and source are credited.
